# Supplementary material
Source: publisher figshare collection journal article supplement (https://frontiersin.figshare.com/ndownloader/files/29612430)

# checkCIF/PLATON report

Structure factors have been supplied for datablock(s) cu\_20200610\_0ma\_a

THIS REPORT IS FOR GUIDANCE ONLY. IF USED AS PART OF A REVIEW PROCEDURE FOR PUBLICATION, IT SHOULD NOT REPLACE THE EXPERTISE OF AN EXPERIENCED CRYSTALLOGRAPHIC REFEREE.

No syntax errors found.      CIF dictionary      Interpreting this report

## Datablock: cu\_20200610\_0ma\_a

---

Bond precision:    C-C = 0.0048 A                      Wavelength=1.54178

Cell:                      a=8.4390(4)              b=19.938(1)              c=6.4295(4)  
                                alpha=90              beta=90              gamma=90  
Temperature:              296 K

|                | Calculated  | Reported    |
|----------------|-------------|-------------|
| Volume         | 1081.81(10) | 1081.81(10) |
| Space group    | P 21 21 2   | P 21 21 2   |
| Hall group     | P 2 2ab     | P 2 2ab     |
| Moiety formula | C12 H12 O5  | C12 H12 O5  |
| Sum formula    | C12 H12 O5  | C12 H12 O5  |
| Mr             | 236.22      | 236.22      |
| Dx,g cm-3      | 1.450       | 1.450       |
| Z              | 4           | 4           |
| Mu (mm-1)      | 0.964       | 0.964       |
| F000           | 496.0       | 496.0       |
| F000'          | 497.80      |             |
| h,k,lmax       | 10,24,7     | 10,24,7     |
| Nref           | 2001[ 1192] | 1997        |
| Tmin,Tmax      |             | 0.503,0.753 |
| Tmin'          |             |             |

Correction method= # Reported T Limits: Tmin=0.503 Tmax=0.753  
AbsCorr = NONE

Data completeness= 1.68/1.00                      Theta(max)= 68.367

R(reflections)= 0.0564( 1831)                      wR2(reflections)= 0.1519( 1997)

S = 1.070                      Npar= 156

---

The following ALERTS were generated. Each ALERT has the format  
**test-name\_ALERT\_alert-type\_alert-level.**  
Click on the hyperlinks for more details of the test.



EXPT005\_ALERT\_1\_A \_expt1\_crystal\_description is missing  
Crystal habit description.  
The following tests will not be performed.  
CRYSR 01

```

PLAT414_ALERT_2_A Short Intra D-H..H-X          H003          ..H00B          1.66 Ang.
                                     x,y,z =          1_555 Check
PLAT699 ALERT 1 A Missing  exptl crystal description Value ..... Please Do !

```



|                   |                                  |      |           |   |              |
|-------------------|----------------------------------|------|-----------|---|--------------|
| PLAT035_ALERT_1_B | _chemical_absolute_configuration | Info | Not Given |   | Please Do !  |
| PLAT420_ALERT_2_B | D-H Without Acceptor             | 0003 | --H003    | . | Please Check |
| PLAT430_ALERT_2_B | Short Inter D...A Contact        | 0005 | ..0005    | . | 2.77 Ang.    |
|                   |                                  |      | 1-x,1-y,z | = | 2 665 Check  |



|                   |                                                  |              |
|-------------------|--------------------------------------------------|--------------|
| PLAT053_ALERT_1_C | Minimum Crystal Dimension Missing (or Error) ... | Please Check |
| PLAT054_ALERT_1_C | Medium Crystal Dimension Missing (or Error) ...  | Please Check |
| PLAT055_ALERT_1_C | Maximum Crystal Dimension Missing (or Error) ... | Please Check |
| PLAT340_ALERT_3_C | Low Bond Precision on C-C Bonds .....            | 0.00483 Ang. |
| PLAT415_ALERT_2_C | Short Inter D-H..H-X H003 ..H00F .               | 2.11 Ang.    |
|                   | -1+x,y,z =                                       | 1_455 Check  |
| PLAT976_ALERT_2_C | Check Calcd Resid. Dens. 1.06A From 0003         | -0.43 eA-3   |
| PLAT976_ALERT_2_C | Check Calcd Resid. Dens. 0.89A From 0004         | -0.42 eA-3   |
| PLAT977_ALERT_2_C | Check Negative Difference Density on H003        | -0.36 eA-3   |
| PLAT977_ALERT_2_C | Check Negative Difference Density on H004        | -0.42 eA-3   |

|                   |                                                  |    |             |
|-------------------|--------------------------------------------------|----|-------------|
| PLAT007_ALERT_5_G | Number of Unrefined Donor-H Atoms .....          | 2  | Report      |
| PLAT720_ALERT_4_G | Number of Unusual/Non-Standard Labels .....      | 29 | Note        |
| PLAT791_ALERT_4_G | Model has Chirality at C00C (Sohnke SpGr)        | S  | Verify      |
| PLAT791_ALERT_4_G | Model has Chirality at C00E (Sohnke SpGr)        | R  | Verify      |
| PLAT883_ALERT_1_G | No Info/Value for _atom_sites_solution_primary . |    | Please Do ! |
| PLAT912_ALERT_4_G | Missing # of FCF Reflections Above Sth/L= 0.600  | 1  | Note        |
| PLAT978_ALERT_2_G | Number C-C Bonds with Positive Residual Density. | 0  | Info        |

3 **ALERT level A** = Most likely a serious problem - resolve or explain  
3 **ALERT level B** = A potentially serious problem, consider carefully  
9 **ALERT level C** = Check. Ensure it is not caused by an omission or oversight  
7 **ALERT level G** = General information/check it is not something unexpected

```
7 ALERT type 1 CIF construction/syntax error, inconsistent or missing data
9 ALERT type 2 Indicator that the structure model may be wrong or deficient
1 ALERT type 3 Indicator that the structure quality may be low
4 ALERT type 4 Improvement, methodology, query or suggestion
1 ALERT type 5 Informative message, check
```

It is advisable to attempt to resolve as many as possible of the alerts in all categories. Often the minor alerts point to easily fixed oversights, errors and omissions in your CIF or refinement strategy, so attention to these fine details can be worthwhile. In order to resolve some of the more serious problems it may be necessary to carry out additional measurements or structure refinements. However, the purpose of your study may justify the reported deviations and the more serious of these should normally be commented upon in the discussion or experimental section of a paper or in the "special\_details" fields of the CIF. checkCIF was carefully designed to identify outliers and unusual parameters, but every test has its limitations and alerts that are not important in a particular case may appear. Conversely, the absence of alerts does not guarantee there are no aspects of the results needing attention. It is up to the individual to critically assess their own results and, if necessary, seek expert advice.

### Publication of your CIF in IUCr journals

A basic structural check has been run on your CIF. These basic checks will be run on all CIFs submitted for publication in IUCr journals (*Acta Crystallographica*, *Journal of Applied Crystallography*, *Journal of Synchrotron Radiation*); however, if you intend to submit to *Acta Crystallographica Section C* or *E* or *IUCrData*, you should make sure that full publication checks are run on the final version of your CIF prior to submission.

### Publication of your CIF in other journals

Please refer to the *Notes for Authors* of the relevant journal for any special instructions relating to CIF submission.

### Validation response form

Please find below a validation response form (VRF) that can be filled in and pasted into your CIF.

```
# start Validation Reply Form
_vrf_EXPT005_cu_20200610_0ma_a
;
PROBLEM: _exptl_crystal_description is missing
RESPONSE: ...
;
_vrf_PLAT414_cu_20200610_0ma_a
;
PROBLEM: Short Intra D-H..H-X          H003          ..H00B          1.66 Ang.
RESPONSE: ...
;
_vrf_PLAT699_cu_20200610_0ma_a
;
PROBLEM: Missing _exptl_crystal_description Value ..... Please Do !
RESPONSE: ...
;
_vrf_PLAT035_cu_20200610_0ma_a
;
PROBLEM: _chemical_absolute_configuration Info Not Given Please Do !
RESPONSE: ...
;
_vrf_PLAT420_cu_20200610_0ma_a
;
PROBLEM: D-H Without Acceptor          0003          --H003          . Please Check
RESPONSE: ...
;
_vrf_PLAT430_cu_20200610_0ma_a
```

```

;
PROBLEM: Short Inter D...A Contact  O005      ..O005      .      2.77 Ang.
RESPONSE: ...
;
_vrf_PLAT053_cu_20200610_0ma_a
;
PROBLEM: Minimum Crystal Dimension Missing (or Error) ...      Please Check
RESPONSE: ...
;
_vrf_PLAT054_cu_20200610_0ma_a
;
PROBLEM: Medium Crystal Dimension Missing (or Error) ...      Please Check
RESPONSE: ...
;
_vrf_PLAT055_cu_20200610_0ma_a
;
PROBLEM: Maximum Crystal Dimension Missing (or Error) ...      Please Check
RESPONSE: ...
;
_vrf_PLAT340_cu_20200610_0ma_a
;
PROBLEM: Low Bond Precision on  C-C Bonds .....      0.00483 Ang.
RESPONSE: ...
;
_vrf_PLAT415_cu_20200610_0ma_a
;
PROBLEM: Short Inter D-H..H-X      H003      ..H00F      .      2.11 Ang.
RESPONSE: ...
;
_vrf_PLAT976_cu_20200610_0ma_a
;
PROBLEM: Check Calcd Resid. Dens.  1.06A      From O003      -0.43 eA-3
RESPONSE: ...
;
_vrf_PLAT977_cu_20200610_0ma_a
;
PROBLEM: Check Negative Difference Density on H003      -0.36 eA-3
RESPONSE: ...
;
# end Validation Reply Form

```

---

**PLATON version of 05/12/2020; check.def file version of 05/12/2020**

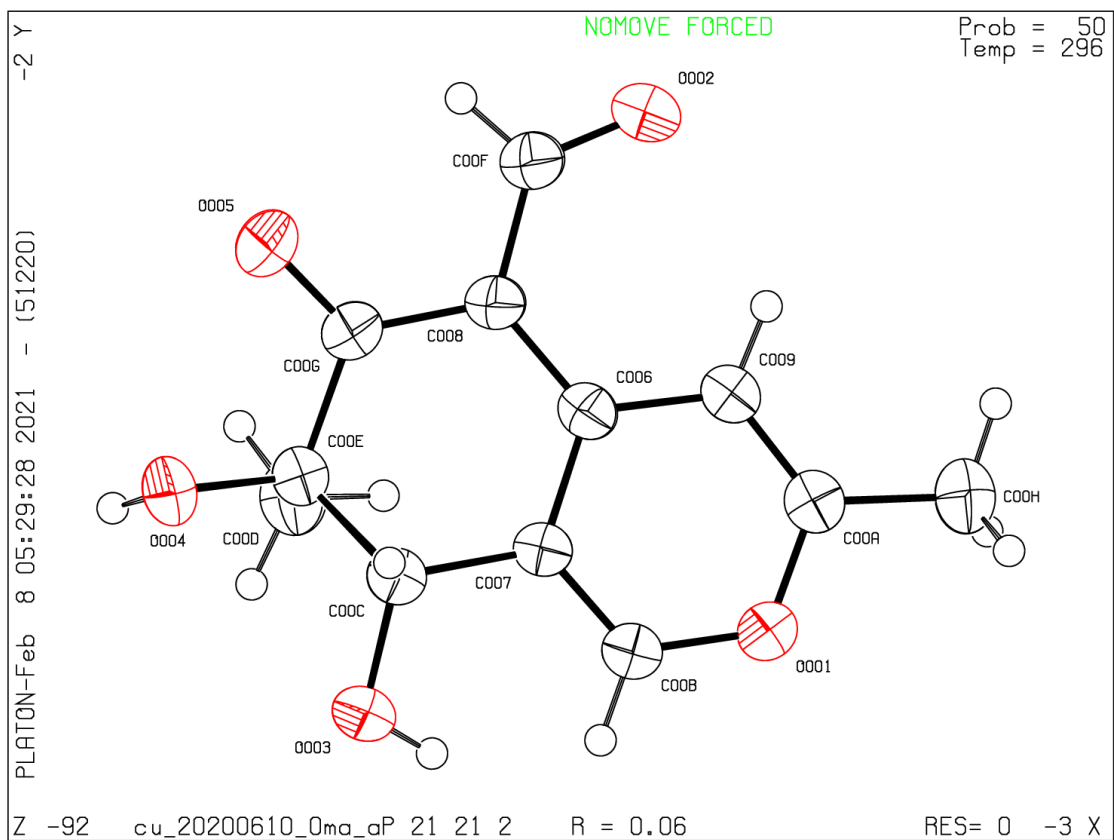

Supplement: Supplementary file [file 29612430]
